# Supplementary material for: Proximal tubule cells in blood and urine as potential biomarkers for kidney disease biopsy
Source: PeerJ journal article supplement (doi:10.7717/peerj.16499), 2023-12-06
Supplement: Supplementary_Materials.zip [file Supplemental Table 1.xlsx]

## Sheet: LY
LY
Specimen type：Serum											Specimen type：urine
Clinical Tests		Project Result		Unit		Reference Range		Methodology			Clinical Tests		Result		Unit		Reference Range		Methodology
K		4.03		mmol/L		3.5—5.3		Electrode method			COLOR		yelow				yelow
Na		140		mmol/L		137—147		Electrode method			CLARIIY		Clear
C1		109.2		mmol/L		99—110		Electrode method			SG		1.03				1.005—1.03
CO2		21		mmol/L		21—31		colorimetric method			PH		6				5—8
GLU		5.92		mmol/L		3.89—6.11					GLU		56↑		mmol/L		0—2.7
UREA		6.14		mmol/L		1.5—7.5		Urease method			KET		negative		mmol/L		negative
CREA		95		umol/L		32—106		Enzymic method			PRO		1↑		g/L		0—0.1
GFR		75.2		ml/min/1.73m2		75—105					BLD		25↑		ERY/uL		0—10
URIC		400		umol/L		210—430		Uricase—peroxidase coupling method			LEU		negative		LEU/uL		0—14
Cys—C		1.23↑		mg/L		0.54—1.15		Immunoturbidimetry			BIL		negative		umol/L		negative
CA		2.33		mmol/L		2—2.8		MB method			LBG		negative		umol/L		0—33
P		0.96		mmol/L		0.96—1.62					NIT		negative				negative
MG		0.88		mmol/L		0.7—1.1					VC		0		mmol/L		0—0.6
Fe		22.5		umol/L		9.5—25		colorimetric method			RBC		14		/uL		0—15
TRF		1.8↓		g /L		2—4		Immunoturbidimetry			WBC		14		/uL		0—20
AMY		57		U/L		15—125		Maltose 7			BAC		0		/uL		0—5
ALT		34		U/L		9—50		Rate Assay			SQEP		2		/uL		0—28
AST		21		U/L		15—40		Rate Assay			NSE		0		/uL		0—6
γ_GT		51		U/L		10—60					HYAL		0		/LPF		0—1
GR		59		U/L		34—73					MUC		39		/uL
ALP		80		U/L		40—150
CHE		8839		U/L		4000—12900
TP		67.2		g /L		65—85		Biuret
ALB		35.8		g /L		35—52		Bromocresol green
PA		201		mg/L		200—400		Immunoturbidimetry
GLB		31.4		g/L		20—40
A/G		1.14↓				1.2—2.4
TBIL		16.1		umol/L		5.1—23		Vanadate method
DBIL		7.6↑		umol/L		0.6—6.8		Vanadate method
IBIL		8.5		umol/L		1.7—17
TBA		1.7		umol/L		0—10		Cycling enzymatic method

## Sheet: XWL
XWL
Specimen type：Serum											Specimen type：urine
Clinical Tests		Result		Unit		Reference Range		Methodology			Clinical Tests		Result		Unit		Reference Range		Methodology
K		5.15		mmol/L		3.5—5.3		Electrode method			COLOR		Pale yellow				yellow
Na		140.9		mmol/L		137—147		Electrode method			CLARIIY		Clear
C1		108.6		mmol/L		99—110		Electrode method			SG		1.009				1.003—1.030
CO2		20.4↓		mmol/L		21—31		colorimetric method			PH		7				5—8.5
GLU		3.55↓		mmol/L		3.89—6.11					GLU		negative		mmol/L		0—2.7
UREA		16.17↑		mmol/L		1.5—7.5		colorimetric method			KET		negative		mmol/L		0—0.4
CREA		608↑		umol/L		32—106		Enzymic method			PRO		0.5↑		g/L		0—0.1
URIC		621↑		umol/L		210—430		Uricase—peroxidase coupling method			BLD		10		ERY/uL		0—10
Cys—C		3.8↑		mg/L		0.54—1.15		Immunoturbidimetry			LEU		negative		LEU/uL		0—24
CA		1.87↓		mmol/L		2—2.8		MB method			BIL		negative		umol/L		negative
P		1.77↑		mmol/L		0.96—1.62		Phosphomolybdate method			LBG		negative		umol/L		0—33
MG		1.3↑		mmol/L		0.7—1.1		MB method			NIT		negative				negative
Fe		8.5↓		umol/L		9.5—25		colorimetric method			VC		negative				negative
TRF		1.423↓		g /L		2—4		Immunoturbidimetry			RBC		92.00↑		/uL		0—15
AMY		38		U/L		15—125		Maltose 7			WBC		1		/uL		0—20
ALT		17		U/L		9—50		Rate Assay			BAC		1		/uL		0—5
AST		23		U/L		15—40		Rate Assay			SQEP		1		/uL		0—28
γ_GT		13		U/L		10—60					NSE		1		/uL		0—6
ALP		57		U/L		40—150					HYAL		0		/LPF		0—1
ADA		8		U/L		4—24					MUC		0		/uL
CHE		9259		U/L		4000—12900
TP		53.2↓		g /L		65—85		Biuret
ALB		24.5↓		g /L		35—52		Bromocresol green
PA		198.7↓		mg/L		200—400		Immunoturbidimetry
GLB		28.7		g/L		20—40
A/G		0.85↓				1.2—2.4
TBIL		7.7		umol/L		5.1—23		Vanadate method
DBIL		3.1		umol/L		0.6—6.8		Vanadate method
IBIL		4.6		umol/L		1.7—17
TBA		2.1		umol/L		0—10		Cycling enzymatic method

## Sheet: YSE
YSE
Specimen type：Serum											Specimen type：urine
Clinical Tests		Result		Unit		Reference Range		Methodology			Clinical Tests		Result		Unit		Reference Range		Methodology
Serum hemolytic index		0									COLOR		Pale yellow				yellow
Serum jaundice index		0									CLARIIY		Clear
Serum lipid index		0									SG		1.011				1.003—1.030
K		3.29↓		mmol/L		3.5—5.3		Electrode method			PH		5.5				5—8.5
Na		140		mmol/L		137—147		Electrode method			GLU		negative		mmol/L		0—2.7
C1		104		mmol/L		99—110		Electrode method			KET		negative		mmol/L		0—0.4
CO2		20.9↓		mmol/L		21—31		colorimetric method			PRO		0.1		g/L		0—0.1
GLU		4.8		mmol/L		3.89—6.11					BLD		10		ERY/uL		0—10
UREA		16.74↑		mmol/L		1.5—7.5		Urease method			LEU		negative		LEU/uL		0—24
CREA		241.6↑		umol/L		32—106		Enzymic method			BIL		negative		umol/L		negative
URIC		605.4↑		umol/L		155—360		Uricase—peroxidase coupling method			LBG		negative		umol/L		0—33
Cys—C		3.1↑		mg/L		0.54—1.15		Immunoturbidimetry			NIT		negative				negative
CA		2.33		mmol/L		2—2.8		MB method			VC		negative				negative
P		1.06		mmol/L		0.96—1.62		Phosphomolybdate method			RBC		2		/uL		0—15
MG		0.74		mmol/L		0.7—1.1		MB method			WBC		4		/uL		0—20
Fe		17.3		umol/L		9.5—25		colorimetric method			BAC		1		/uL		0—5
TRF		2.48		g /L		2—4		Immunoturbidimetry			SQEP		3		/uL		0—28
AMY		147.1↑		U/L		15—125		Maltose 7			NSE		0		/uL		0—6
ALT		8		U/L		7—40		Rate Assay			HYAL		0		/LPF		0—1
AST		13		U/L		13—35		Rate Assay			MUC		1		/uL
γ_GT		10		U/L		7—45
ALP		102		U/L		40—150
ADA		6		U/L		4—24
CHE		6481		U/L		4000—12900
TP		74		g /L		65—85		Biuret
ALB		43.2		g /L		35—52		Bromocresol green
PA		242.3		mg/L		200—400		Immunoturbidimetry
GLB		30.83		g/L		20—40
A/G		1.4				1.2—2.4
TBIL		10.8		umol/L		5.1—23		Vanadate method
DBIL		1.8		umol/L		0.6—6.8		Vanadate method

## Sheet: ZTR
ZTR
Specimen type：Serum											Specimen type：urine
Clinical Tests		Result		Unit		Reference Range		Methodology			Project Name		Result		Unit		Reference Range		Methodology
K		4.08		mmol/L		3.5—5.3		Electrode method			COLOR		Pale yellow				yellow
Na		137.7		mmol/L		137—147		Electrode method			CLARIIY		Clear
C1		103.7		mmol/L		99—110		Electrode method			SG		1.01				1.003—1.030
CO2		21.3		mmol/L		21—31		colorimetric method			PH		5				5—8.5
GLU		5.31		mmol/L		3.89—6.11					GLU		negative		mmol/L		0—2.7
UREA		8.09↑		mmol/L		1.5—7.5		Urease method			KET		negative		mmol/L		0—0.4
CREA		150↑		umol/L		32—106		Enzymic method			PRO		0.1		g/L		0—0.1
UREA/CR		0.054									BLD		25↑		ERY/uL		0—10
URIC		608↑		umol/L		210—430		Uricase—peroxidase coupling method			LEU		negative		LEU/uL		0—24
Cys—C		1.97↑		mg/L		0.54—1.15		Immunoturbidimetry			BIL		negative		umol/L		negative
CA		2.16		mmol/L		2—2.8		MB method			LBG		negative		umol/L		0—33
P		0.91↓		mmol/L		0.96—1.62		Phosphomolybdate method			NIT		negative				negative
MG		0.81		mmol/L		0.7—1.1		MB method			VC		negative				negative
Fe		8.9↓		umol/L		9.5—25		colorimetric method			RBC		17↑		/uL		0—15
TRF		2.075		g /L		2—4		Immunoturbidimetry			WBC		4		/uL		0—20
AMY		68		U/L		15—125		Maltose 7			BAC		0		/uL		0—5
ALT		32		U/L		9—50		Rate Assay			SQEP		0		/uL		0—28
AST		28		U/L		15—40		Rate Assay			NSE		0		/uL		0—6
γ_GT		26		U/L		10—60					HYAL		0		/LPF		0—1
ALP		70		U/L		40—150					MUC		5		/uL
ADA		7		U/L		4—24
CHE		9134		U/L		4000—12900
TP		73.4		g /L		65—85		Biuret
ALB		37.3		g /L		35—52		Bromocresol green
PA		397.3		mg/L		200—400		Immunoturbidimetry
GLB		36.1		g/L		20—40
A/G		1.03↓				1.2—2.4
TBIL		6.6		umol/L		5.1—23		Vanadate method
DBIL		1.9		umol/L		0.6—6.8		Vanadate method
IBIL		4.7		umol/L		1.7—17
TBA		6.8		umol/L		0—10		Cycling enzymatic method
