# Supplementary material for: Proximal tubule cells in blood and urine as potential biomarkers for kidney disease biopsy
Source: PeerJ journal article supplement (doi:10.7717/peerj.16499), 2023-12-06
Supplement: Supplementary_Materials.zip [file Supplemental Table 2.xls]

Cluster	Sample	Group	Cell_Ident	Cell_Ident1	Count	Percent
Cluster0	TS_ly	Cluster0_TS_ly	C0_Fib.dm	C0_Fibroblasts.damage	24	0.0873
Cluster0	TS_xwl	Cluster0_TS_xwl	C0_Fib.dm	C0_Fibroblasts.damage	41	0.1491
Cluster0	TS_yse	Cluster0_TS_yse	C0_Fib.dm	C0_Fibroblasts.damage	41	0.1491
Cluster0	TS_zrt	Cluster0_TS_zrt	C0_Fib.dm	C0_Fibroblasts.damage	169	0.6145
Cluster1	TS_ly	Cluster1_TS_ly	C1_Basal.dm	C1_Basal cells.damage	39	0.1902
Cluster1	TS_xwl	Cluster1_TS_xwl	C1_Basal.dm	C1_Basal cells.damage	3	0.0146
Cluster1	TS_yse	Cluster1_TS_yse	C1_Basal.dm	C1_Basal cells.damage	93	0.4537
Cluster1	TS_zrt	Cluster1_TS_zrt	C1_Basal.dm	C1_Basal cells.damage	70	0.3415
Cluster2	TS_ly	Cluster2_TS_ly	C2_CD8+ T	C2_CD8+ T cells	27	0.1677
Cluster2	TS_xwl	Cluster2_TS_xwl	C2_CD8+ T	C2_CD8+ T cells	20	0.1242
Cluster2	TS_yse	Cluster2_TS_yse	C2_CD8+ T	C2_CD8+ T cells	73	0.4534
Cluster2	TS_zrt	Cluster2_TS_zrt	C2_CD8+ T	C2_CD8+ T cells	41	0.2547
Cluster3	TS_ly	Cluster3_TS_ly	C3_AL/DL/Epi	C3_Ascending Limb/Decending Limb/Epithelial cells	4	0.0278
Cluster3	TS_xwl	Cluster3_TS_xwl	C3_AL/DL/Epi	C3_Ascending Limb/Decending Limb/Epithelial cells	11	0.0764
Cluster3	TS_yse	Cluster3_TS_yse	C3_AL/DL/Epi	C3_Ascending Limb/Decending Limb/Epithelial cells	103	0.7153
Cluster3	TS_zrt	Cluster3_TS_zrt	C3_AL/DL/Epi	C3_Ascending Limb/Decending Limb/Epithelial cells	26	0.1806
Cluster4	TS_ly	Cluster4_TS_ly	C4_PT.dm	C4_Proximal Tubule Epithelial Cells.damage	3	0.0261
Cluster4	TS_xwl	Cluster4_TS_xwl	C4_PT.dm	C4_Proximal Tubule Epithelial Cells.damage	3	0.0261
Cluster4	TS_yse	Cluster4_TS_yse	C4_PT.dm	C4_Proximal Tubule Epithelial Cells.damage	105	0.913
Cluster4	TS_zrt	Cluster4_TS_zrt	C4_PT.dm	C4_Proximal Tubule Epithelial Cells.damage	4	0.0348
Cluster5	TS_ly	Cluster5_TS_ly	C5_PT	C5_Proximal Tubule Epithelial Cells	1	0.0093
Cluster5	TS_xwl	Cluster5_TS_xwl	C5_PT	C5_Proximal Tubule Epithelial Cells	5	0.0467
Cluster5	TS_yse	Cluster5_TS_yse	C5_PT	C5_Proximal Tubule Epithelial Cells	48	0.4486
Cluster5	TS_zrt	Cluster5_TS_zrt	C5_PT	C5_Proximal Tubule Epithelial Cells	53	0.4953
Cluster6	TS_ly	Cluster6_TS_ly	C6_Mac/DC	C6_Macrophages/Dendritic cells	4	0.0408
Cluster6	TS_xwl	Cluster6_TS_xwl	C6_Mac/DC	C6_Macrophages/Dendritic cells	6	0.0612
Cluster6	TS_yse	Cluster6_TS_yse	C6_Mac/DC	C6_Macrophages/Dendritic cells	42	0.4286
Cluster6	TS_zrt	Cluster6_TS_zrt	C6_Mac/DC	C6_Macrophages/Dendritic cells	46	0.4694
Cluster7	TS_ly	Cluster7_TS_ly	C7_NK	C7_Natural killer cells	11	0.131
Cluster7	TS_xwl	Cluster7_TS_xwl	C7_NK	C7_Natural killer cells	11	0.131
Cluster7	TS_yse	Cluster7_TS_yse	C7_NK	C7_Natural killer cells	43	0.5119
Cluster7	TS_zrt	Cluster7_TS_zrt	C7_NK	C7_Natural killer cells	19	0.2262
Cluster8	TS_yse	Cluster8_TS_yse	C8_Bas/Fib.dm	C8_Basal cells/Fibroblasts.damage	72	1
Cluster9	TS_ly	Cluster9_TS_ly	C9_DC	C9_Dendritic cells	10	0.2439
Cluster9	TS_xwl	Cluster9_TS_xwl	C9_DC	C9_Dendritic cells	3	0.0732
Cluster9	TS_yse	Cluster9_TS_yse	C9_DC	C9_Dendritic cells	21	0.5122
Cluster9	TS_zrt	Cluster9_TS_zrt	C9_DC	C9_Dendritic cells	7	0.1707
Cluster10	TS_ly	Cluster10_TS_ly	C10_B	C10_B cells	19	0.475
Cluster10	TS_xwl	Cluster10_TS_xwl	C10_B	C10_B cells	2	0.05
Cluster10	TS_yse	Cluster10_TS_yse	C10_B	C10_B cells	13	0.325
Cluster10	TS_zrt	Cluster10_TS_zrt	C10_B	C10_B cells	6	0.15
Cluster11	TS_yse	Cluster11_TS_yse	C11_Neu	C11_Neutrophils	11	0.4074
Cluster11	TS_zrt	Cluster11_TS_zrt	C11_Neu	C11_Neutrophils	16	0.5926
