# Supplementary material for: Proximal tubule cells in blood and urine as potential biomarkers for kidney disease biopsy
Source: PeerJ journal article supplement (doi:10.7717/peerj.16499), 2023-12-06
Supplement: Supplementary_Materials.zip [file Supplemental Table 3.xlsx]

## Sheet: Supplemental Table 3
p_val	avg_logFC	pct.1	pct.2	p_val_adj			mesangial cell
MTRNR2L3	0.050411	2.5251	0.307	0.235	1	non-coding RNA
XPO4	0.00618126	1.75382	0.327	0.383	1	PMID:?11701995	IGFBP-3 could contribute to apoptotic processes observed in human disease. an increase of IGFBP-3 is observed before the production of apoptosis
IGFBP3	5.21e-10	1.63771	0.351	0.476	1.56e-06	22318747	GFBP3 immunoreactivity may appear elevated in patients with chronic kidney disease (CKD), in part due to accumulation of low molecular fragments.?
ZNF574	6.76e-07	1.61539	0.288	0.414	0.00202728	PMID:?15935983	IGFBP-3 actions during mesangial cell apoptosis induced by cytokine or high glucose concentration
FRYL	0.000460553	1.52427	0.327	0.454	1	PMID:?29409347	expressed in cells constituting glomerulus as well as convoluted tubule in the kidney. Fryl expression in glomerular cells, convoluted tubules, and/or collecting ducts in the kidneys
NPAT	0.0118685	1.45493	0.561	0.46	1
NFKBID	2.84e-06	1.37173	0.332	0.434	0.00852382
HAUS6	0.000737129	1.32391	0.493	0.499	1
MTND2P28	0.00272855	1.31303	0.176	0.338	1
BEX2	1.92e-05	1.31071	0.551	0.425	0.0575487
BCL6	0.430326	1.29703	0.395	0.393	1
USP36	0.0237237	1.2385	0.532	0.442	1
HDLBP	0.343205	1.20751	0.346	0.345	1	PMID:?3006785	Specific saturable binding of rat high-density lipoproteins to rat kidney membranes
PPRC1	0.000821965	1.16809	0.561	0.484	1	PMID:?10432401	Down-regulation of hepatic high-density lipoprotein receptor, SR-B1, in nephrotic syndrome
SLCO4C1	2.2e-10	1.15769	0.141	0.353	6.61e-07
CPEB2	0.00980996	1.14991	0.424	0.454	1
RAB20	0.000268934	1.1354	0.551	0.442	0.806803
VAV3	0.0324628	1.12396	0.556	0.497	1
IL6ST	3.01e-10	1.11606	0.327	0.497	9.02e-07
CCL4L2	0.00291253	1.10655	0.556	0.438	1
RAB12	0.738066	1.10144	0.556	0.49	1
AFTPH	0.011501	1.08967	0.546	0.507	1
FOXO1	2.49e-13	1.08452	0.327	0.521	7.47e-10
ABL2	4.08e-05	1.08387	0.122	0.308	0.122389
NAMPTP1	0.512563	1.07427	0.449	0.436	1
FCMR	4.31e-07	1.0562	0.273	0.43	0.00129436
IER3	0.293637	1.04895	0.551	0.515	1
PAK1	0.000213408	1.04289	0.346	0.44	0.640225
CSTA	0.399511	1.02797	0.459	0.463	1
TMEM154	0.631672	1.01932	0.259	0.326	1
KLF4	0.0185785	1.01606	0.546	0.485	1
GLTP	0.291401	1.00407	0.527	0.481	1
HLA-DMA	0.00113653	1.0001	0.356	0.474	1
ARHGAP35	3.81e-06	0.993836	0.439	0.498	0.0114362
EMILIN2	0.266713	0.956773	0.327	0.356	1
CLDN7	4.36e-44	0.955621	0.073	0.471	1.31e-40
MYL6B	0.000142455	0.951714	0.229	0.376	0.427364
HES1	0.981811	0.946549	0.551	0.484	1
YWHAG	8.63e-14	0.935434	0.346	0.519	2.59e-10
LARP4	0.00133102	0.926033	0.38	0.454	1
CD3D	2.97e-07	0.92575	0.39	0.493	0.000889677
MXD1	0.00959677	0.92125	0.371	0.447	1
GAK	1.06e-12	0.92104	0.127	0.393	3.19e-09
OGFR	0.00077653	0.905622	0.429	0.499	1
NFIL3	0.000391293	0.901608	0.551	0.466	1
SUN1	0.559178	0.89291	0.532	0.436	1
CPD	1.03e-08	0.892175	0.322	0.475	3.09e-05
MED21	0.00657948	0.888408	0.541	0.403	1
ZFHX3	1.41e-08	0.886567	0.371	0.484	4.23e-05
PGGT1B	0.0310872	0.884867	0.415	0.444	1
CCL3	0.674681	0.879516	0.571	0.488	1
BAG3	3.99e-11	0.869877	0.371	0.51	1.2e-07
TRABD2A	0.0580601	0.868233	0.376	0.45	1
MINDY2	1.93e-18	0.853468	0.2	0.475	5.78e-15
FCGRT	0.427411	0.847141	0.546	0.49	1
NSL1	3.74e-13	0.846761	0.156	0.415	1.12e-09
CEBPB	0.152947	0.844869	0.527	0.442	1
MAPRE3	1.03e-11	0.84299	0.361	0.485	3.09e-08
AHR	3.63e-10	0.839123	0.366	0.497	1.09e-06
NAMPT	0.885061	0.835576	0.59	0.545	1
CD4	0.00571738	0.827443	0.546	0.514	1
ZNF770	6.05e-06	0.826385	0.337	0.445	0.0181496
TYMP	0.00191048	0.823643	0.346	0.427	1
CD33	0.754365	0.807625	0.351	0.397	1
TPM1	0.000719819	0.803494	0.439	0.506	1
KPNA6	0.00425505	0.803065	0.385	0.43	1
COPG1	3.86e-09	0.801731	0.361	0.484	1.16e-05
MRPL27	1.56e-07	0.797045	0.195	0.375	0.000467972
CCNG2	0.0217619	0.795561	0.551	0.509	1
TGIF2	5.52e-12	0.794692	0.239	0.433	1.66e-08
CENPB	0.821502	0.794578	0.546	0.486	1
HSPD1	5.29e-10	0.792604	0.527	0.591	1.59e-06
RBPMS	7.06e-10	0.791911	0.371	0.508	2.12e-06
TET2	5.67e-10	0.791312	0.273	0.456	1.7e-06
PTBP3	2e-09	0.790405	0.512	0.572	6.01e-06
CACTIN	0.111666	0.786757	0.541	0.478	1
PPP1R12B	0.000209214	0.784627	0.205	0.362	0.627641
LPXN	1.44e-08	0.780301	0.395	0.506	4.33e-05
LEF1	0.139235	0.762912	0.327	0.39	1
KMO	0.00239719	0.759234	0.19	0.305	1
IPO7	5.84e-09	0.755944	0.444	0.534	1.75e-05
DHRS7	2.02e-13	0.752591	0.376	0.558	6.07e-10
RNASET2	2.79e-05	0.75106	0.259	0.405	0.0836767
KCNJ16	0.000368604	0.749278	0.546	0.474	1
CKAP4	0.0375197	0.745409	0.556	0.529	1
UBE2E3	0.000212762	0.740806	0.366	0.441	0.638286
CRELD2	3.19e-10	0.737811	0.259	0.426	9.58e-07
TRIM37	1.3e-35	0.736643	0.024	0.345	3.9e-32
H2AFX	0.191123	0.732577	0.341	0.424	1
PLBD1	1.92e-08	0.730885	0.229	0.395	5.76e-05
ARHGEF9	0.556938	0.730552	0.512	0.435	1
IL18	0.956576	0.713041	0.537	0.527	1
MTCO1P12	0.0829739	0.707637	0.663	0.753	1
LGALS3	0.554171	0.706865	0.561	0.512	1
NEMF	0.902644	0.70041	0.541	0.452	1
NDUFS3	0.000115304	0.698022	0.239	0.384	0.345911
GMNN	7.72e-06	0.697206	0.244	0.397	0.023165
UBAP2L	6.86e-15	0.694108	0.366	0.535	2.06e-11
NDRG2	0.707511	0.693929	0.556	0.521	1
DUSP2	1.48e-13	0.690276	0.463	0.569	4.45e-10
ERLIN2	9.7e-06	0.689954	0.112	0.311	0.0291129
KYNU	0.831433	0.688183	0.522	0.453	1
MCCC2	5.33e-06	0.684884	0.322	0.441	0.0160046
CTNND1	4.14e-07	0.682291	0.488	0.511	0.00124308
SH3GL1	0.00999306	0.678909	0.385	0.448	1
CD83	0.0534655	0.676036	0.566	0.496	1
ACAA2	1.01e-08	0.675988	0.259	0.424	3.03e-05
ACSL3	4.6e-07	0.666375	0.234	0.41	0.00137903
KDM1B	0.480038	0.664247	0.532	0.473	1
EPSTI1	3.06e-31	0.66402	0.195	0.523	9.19e-28
CHD9	0.0017254	0.662373	0.546	0.514	1
PLEKHA5	2.17e-09	0.662021	0.361	0.504	6.51e-06
LDLR	0.00298937	0.660978	0.546	0.46	1
PLEK	0.0406821	0.655047	0.527	0.525	1
TIPARP	4.02e-17	0.651512	0.263	0.491	1.21e-13
FAM192A	0.342104	0.651114	0.546	0.492	1
MARCKS	0.0154242	0.650323	0.58	0.556	1
DSTYK	0.0167136	0.648808	0.298	0.376	1
LTO1	3.4e-20	0.647095	0.039	0.355	1.02e-16
2023-03-01	0.000389497	0.645361	0.361	0.466	1
TRBC1	0.301458	0.64325	0.532	0.474	1
PLEKHA8	0.00201466	0.641498	0.332	0.407	1
TTC14	0.474252	0.638927	0.463	0.386	1
GEMIN6	0.00526685	0.632896	0.356	0.447	1
NUCB2	0.000649621	0.631326	0.522	0.509	1
FCN1	3.46e-16	0.630926	0.185	0.401	1.04e-12
SNTB1	4.4e-12	0.630394	0.249	0.455	1.32e-08
TNFRSF1B	0.000186789	0.629058	0.556	0.539	0.560367
MTCO3P12	1.55e-05	0.628332	0.483	0.314	0.0465616
CST3	0.00188119	0.628299	0.478	0.482	1
MMAB	4.37e-06	0.624853	0.522	0.359	0.0130956
EMC6	1.26e-08	0.620534	0.239	0.414	3.77e-05
DMXL2	0.000717072	0.61886	0.205	0.344	1
PRKAG2	0.149715	0.617493	0.351	0.371	1
TBL1X	0.00982819	0.616515	0.551	0.517	1
PSAP	2.17e-09	0.614151	0.62	0.686	6.52e-06
FGGY	0.0312762	0.611477	0.361	0.387	1
NCAPD2	0.0190036	0.609636	0.444	0.335	1
MT2A	0.137736	0.605786	0.585	0.579	1
SPOCK2	2.46e-05	0.604886	0.385	0.548	0.0737061
MDC1	0.0377898	0.604829	0.239	0.323	1
CDC7	0.189626	0.603967	0.351	0.368	1
BICC1	0.000508424	0.601946	0.522	0.431	1
ERC1	0.923028	0.601449	0.322	0.375	1
SPNS2	0.015504	0.600763	0.385	0.423	1
NACC1	0.300492	0.598613	0.42	0.429	1
ZDHHC18	1.99e-09	0.586664	0.224	0.404	5.96e-06
JPX	1.8e-09	0.585154	0.288	0.454	5.39e-06
DENND3	0.759476	0.574335	0.527	0.466	1
ALS2	0.000296947	0.567436	0.551	0.46	0.890842
NBPF3	0.0567558	0.567244	0.522	0.424	1
SIPA1L1	0.0389301	0.566589	0.346	0.393	1
LST1	0.00034805	0.564799	0.395	0.464	1
LMNB1	0.317378	0.563646	0.346	0.371	1
ESD	0.000306589	0.548065	0.346	0.457	0.919766
SMCO4	4.81e-06	0.54599	0.361	0.447	0.0144271
NPC2	2.96e-08	0.545808	0.307	0.448	8.87e-05
OTUD6B-AS1	1.05e-10	0.544585	0.293	0.484	3.14e-07
CSF2RA	0.0038764	0.542775	0.38	0.443	1
DLST	3.28e-16	0.542375	0.063	0.354	9.84e-13
LDHA	1.14e-27	0.541979	0.2	0.507	3.41e-24
VPS50	5.31e-13	0.53682	0.195	0.412	1.59e-09
BACH1	1.12e-08	0.536517	0.268	0.418	3.35e-05
MAP2K4	1.7e-10	0.534765	0.376	0.495	5.09e-07
CSF2RB	0.82207	0.532745	0.273	0.306	1
NEU1	2.15e-12	0.532027	0.4	0.537	6.46e-09
MAP4	0.0190345	0.530849	0.439	0.45	1
ASH1L	0.0535599	0.530406	0.517	0.503	1
FCER1G	0.186381	0.529907	0.449	0.465	1
PAWR	0.000256025	0.527829	0.38	0.496	0.768076
SUCNR1	0.00124451	0.525703	0.18	0.332	1
MFSD1	0.419232	0.524459	0.551	0.512	1
UQCRH	1.84e-05	0.52315	0.541	0.576	0.0551938
MTRES1	0.166373	0.520033	0.541	0.449	1
ECHS1	0.61342	0.5191	0.541	0.517	1
APOOL	0.200242	0.517464	0.356	0.307	1
APOBR	0.000218421	0.514542	0.215	0.361	0.655262
ASCC2	0.029959	0.513641	0.385	0.43	1
ANK3	0.131758	0.512783	0.546	0.452	1
TMEM106B	2.92e-10	0.512231	0.366	0.5	8.77e-07
ANKRD40	0.000832732	0.511302	0.19	0.335	1
WSB1	7.37e-13	0.510836	0.38	0.532	2.21e-09
MAP3K8	0.865086	0.510454	0.463	0.385	1
NPTN	8.13e-06	0.508379	0.551	0.542	0.0243952
RNF130	0.0284693	0.499797	0.502	0.474	1
KIF20B	1.11e-07	0.499643	0.337	0.453	0.000334006
HLCS	0.00956552	0.499539	0.356	0.412	1
FEZ2	0.000792251	0.499294	0.395	0.455	1
NSUN3	9.45e-07	0.496867	0.215	0.378	0.00283587
CARMIL1	6.29e-11	0.494719	0.385	0.545	1.89e-07
TMEM205	0.574483	0.494217	0.551	0.525	1
CTSS	1.53e-09	0.493157	0.424	0.562	4.58e-06
INO80C	7e-07	0.487155	0.254	0.399	0.00210129
ATP5PB	2.59e-12	0.485811	0.39	0.54	7.78e-09
SMARCA1	0.76781	0.483713	0.483	0.475	1
MPEG1	0.0860418	0.482805	0.556	0.502	1
HIF1A	0.00732662	0.480929	0.507	0.473	1
ST8SIA4	0.000883069	0.48035	0.366	0.441	1
BEX3	3.64e-09	0.478697	0.371	0.5	1.09e-05
SNX13	3.59e-14	0.476389	0.385	0.529	1.08e-10
RAB3GAP1	6.19e-13	0.474834	0.161	0.408	1.86e-09
ABLIM1	0.00693927	0.470666	0.551	0.537	1
ZCCHC7	4.29e-12	0.466278	0.332	0.48	1.29e-08
HEG1	1.67e-15	0.460976	0.161	0.414	5.01e-12
LY86	0.000888447	0.45834	0.522	0.5	1
POLA1	0.000419024	0.457791	0.424	0.479	1
MKRN2	4.14e-05	0.457641	0.541	0.425	0.124252
RALGAPA2	2.37e-06	0.457303	0.346	0.465	0.00711159
UQCRQ	4.43e-05	0.455937	0.556	0.599	0.132794
C15orf48	0.00366723	0.455042	0.561	0.484	1
PANK3	0.672354	0.452898	0.532	0.448	1
PLEKHM3	0.0753263	0.451258	0.546	0.485	1
S100A2	0.0446752	0.451131	0.395	0.43	1
AMPD3	2.01e-06	0.450182	0.2	0.374	0.00601639
GNPTG	0.206163	0.449847	0.449	0.459	1
WDR89	0.0765216	0.446119	0.541	0.448	1
SFXN1	2.54e-13	0.442223	0.273	0.469	7.62e-10
ZNF236	0.523379	0.4416	0.532	0.447	1
API5	0.609593	0.44099	0.341	0.34	1
G6PC3	0.000252221	0.439313	0.132	0.314	0.756664
TGFBI	0.0238074	0.439081	0.522	0.403	1
ZMIZ1	0.000253579	0.438076	0.42	0.471	0.760737
ZNF292	3.69e-09	0.437871	0.332	0.491	1.11e-05
SUSD6	0.00742884	0.435563	0.551	0.515	1
AC008124.1	0.000356183	0.434935	0.283	0.4	1
PTGR1	0.0091941	0.434534	0.541	0.494	1
MTCH2	0.683131	0.432544	0.556	0.521	1
NUAK2	3.28e-07	0.429875	0.205	0.397	0.000983632
WIPF2	7.29e-22	0.427874	0.146	0.482	2.19e-18
SLC12A9	0.00240053	0.425632	0.312	0.387	1
RRS1	1.16e-07	0.425195	0.361	0.454	0.000347158
IFIT3	1.64e-14	0.425063	0.337	0.527	4.91e-11
HPN	6.6e-05	0.424003	0.522	0.412	0.197979
ZNF621	0.00796016	0.423265	0.337	0.402	1
CUBN	0.306951	0.422948	0.341	0.326	1
TFRC	2.71e-09	0.422293	0.288	0.448	8.12e-06
NFIC	0.00130032	0.421606	0.541	0.52	1
DIMT1	0.529177	0.420704	0.268	0.338	1
PKM	1.15e-56	0.417176	0.049	0.563	3.45e-53
NIFK-AS1	0.519477	0.417048	0.532	0.448	1
SORBS3	0.000239355	0.416372	0.532	0.453	0.718066
FCGR3B	0.000106213	0.415624	0.546	0.432	0.318639
SCAF8	0.166628	0.415548	0.546	0.464	1
EIF2AK2	1.96e-10	0.41286	0.307	0.484	5.87e-07
DOCK4	4.92e-09	0.41003	0.537	0.41	1.48e-05
PIGP	0.360211	0.402903	0.537	0.46	1
DDX10	0.00277182	0.400157	0.429	0.463	1
SGK3	0.000670093	0.39855	0.361	0.445	1
ITGAX	0.0451147	0.398287	0.551	0.47	1
GNAQ	3.11e-24	0.39538	0.083	0.368	9.34e-21
POLD3	0.00258096	0.393159	0.249	0.355	1
IRF6	0.213636	0.392221	0.532	0.473	1
SOD2	6.05e-12	0.392136	0.385	0.546	1.82e-08
HPGD	9.51e-05	0.391712	0.351	0.429	0.285189
NAGA	5.17e-15	0.390997	0.332	0.5	1.55e-11
RNPC3	0.00214777	0.389946	0.395	0.46	1
MLKL	0.000729723	0.388803	0.541	0.444	1
CITED4	0.00486979	0.38831	0.522	0.414	1
HMGN3	0.0165287	0.388192	0.556	0.531	1
ATP6V1B2	0.00689082	0.386123	0.546	0.508	1
COTL1	0.0140221	0.385516	0.576	0.554	1
ARHGEF6	3.64e-16	0.383774	0.132	0.412	1.09e-12
DNAJC1	1.36e-11	0.378565	0.283	0.462	4.09e-08
ZBTB16	0.940479	0.377552	0.527	0.456	1
GIGYF2	1.85e-07	0.376877	0.434	0.527	0.000555996
ITGB8	0.000657967	0.37668	0.522	0.424	1
ZBP1	0.72965	0.372783	0.283	0.337	1
GCH1	0.786915	0.372666	0.537	0.454	1
ZNF106	1.38e-06	0.371983	0.541	0.557	0.00412665
GFM1	1.13e-10	0.371447	0.366	0.5	3.39e-07
NCF2	0.00064242	0.370529	0.322	0.43	1
RALBP1	3.27e-12	0.36917	0.205	0.445	9.81e-09
PLAC8	0.000310199	0.367248	0.527	0.52	0.930596
FTL	3.35e-12	0.366133	0.595	0.736	1e-08
LTB	3.59e-30	0.363086	0.18	0.494	1.08e-26
SREBF1	0.0364605	0.360735	0.517	0.472	1
AP5M1	7.25e-11	0.359247	0.307	0.491	2.17e-07
RAP2A	0.0442525	0.35776	0.229	0.33	1
YWHAE	5.8e-09	0.357245	0.541	0.574	1.74e-05
TMEM161B	0.000826106	0.357173	0.283	0.382	1
N4BP2	0.000874745	0.357123	0.259	0.357	1
ZSWIM6	0.211895	0.353548	0.541	0.473	1
ASXL1	0.117439	0.353345	0.288	0.359	1
NR4A1	8.26e-28	0.353007	0.239	0.532	2.48e-24
ATP5IF1	0.0934062	0.349916	0.551	0.54	1
KIFAP3	0.00264501	0.348433	0.385	0.453	1
BEX4	7.98e-15	0.347481	0.356	0.517	2.4e-11
TPD52	8.86e-08	0.344298	0.337	0.473	0.000265908
DNAJC13	0.0489994	0.344068	0.434	0.466	1
ZHX1	0.0490561	0.343407	0.551	0.489	1
C15orf39	0.577562	0.342224	0.468	0.444	1
TMEM63A	3.53e-16	0.341752	0.063	0.343	1.06e-12
GNL1	0.000149756	0.341634	0.537	0.42	0.449268
GLIPR1	0.036001	0.341146	0.488	0.456	1
PRDX1	4.78e-09	0.339812	0.546	0.585	1.43e-05
MFHAS1	2.24e-12	0.339152	0.385	0.525	6.72e-09
GPX1	1.5e-07	0.33904	0.361	0.493	0.000450757
CSNK1G2	6.86e-05	0.337809	0.215	0.374	0.205875
PNMA1	0.00758951	0.333027	0.546	0.473	1
TYROBP	0.990201	0.332763	0.566	0.503	1
CHCHD1	3.88e-08	0.332661	0.346	0.475	0.000116535
GPRIN3	1.32e-07	0.332322	0.278	0.419	0.00039579
MT1E	0.814903	0.33219	0.507	0.453	1
MEA1	1.07e-05	0.331926	0.371	0.46	0.0321112
CD300E	0.002882	0.331455	0.541	0.445	1
THEM4	0.013815	0.32884	0.38	0.445	1
HNRNPR	1.1e-19	0.326025	0.302	0.543	3.31e-16
TKT	2.55e-07	0.325663	0.541	0.552	0.000765298
FUT8	0.000413836	0.324795	0.249	0.357	1
CAND1	0.00111384	0.322947	0.488	0.484	1
ZYX	0.202069	0.322921	0.532	0.487	1
IL1RN	2.16e-06	0.322911	0.556	0.488	0.00647246
PIGM	1.4e-09	0.321998	0.229	0.418	4.21e-06
ZFAND6	0.060289	0.321345	0.522	0.486	1
TBX21	8.4e-19	0.321251	0.088	0.34	2.52e-15
TOM1	0.272559	0.321157	0.551	0.519	1
DCAF13	0.000804104	0.320218	0.424	0.463	1
LINC00926	1.57e-06	0.317312	0.107	0.319	0.00471909
SGK1	6.75e-07	0.31609	0.39	0.469	0.00202572
SLC35F5	0.43478	0.312851	0.39	0.431	1
MDN1	2.23e-07	0.311146	0.239	0.399	0.000667861
RECQL	0.405648	0.310927	0.527	0.506	1
PLIN2	0.0854188	0.31065	0.551	0.479	1
MT1L	0.0335891	0.30992	0.2	0.301	1
CNBP	6.51e-09	0.308826	0.532	0.567	1.95e-05
LGALS3BP	7.16e-12	0.308791	0.385	0.536	2.15e-08
FCGR3A	0.0193721	0.308569	0.444	0.455	1
SCOC	0.375858	0.308027	0.546	0.514	1
S100A10	2.1e-07	0.307846	0.498	0.537	0.000629827
HSPA1A	8.13e-12	0.306684	0.561	0.61	2.44e-08
PSEN1	5.72e-08	0.305914	0.39	0.486	0.000171538
CRYL1	0.0583137	0.304556	0.556	0.52	1
PNKD	0.0010147	0.304251	0.434	0.485	1
RANBP2	3.24e-16	0.304037	0.366	0.546	9.72e-13
BMS1	4.21e-44	0.303203	0.02	0.415	1.26e-40
P2RX4	0.000120303	0.302788	0.332	0.412	0.36091
POLR2D	0.147871	0.302195	0.424	0.42	1
LDHB	0.0157495	0.301689	0.537	0.503	1
TLE3	0.178449	0.300682	0.541	0.505	1
